# Supplementary material for: Microfluidic-organic thin film transistor coupled platform for simple solution exposure
Source: Royal Society of Chemistry journal article supplement (doi:10.1039/d3lf00269a), 2024-01-01
Supplement: d3lf00269a1.pdf [file d3lf00269a1.pdf]

# Microfluidic-Organic Thin Film Transistor Coupled Platform for Chemical Sensing

*Nicholas T. Boileau<sup>1</sup>, Benjamin King<sup>1</sup>, Sparsh Kapar<sup>1</sup>, Ali Najafi Sohi<sup>2</sup>, Joseph G. Manion<sup>1</sup>, Michel Godin<sup>2,3</sup>, and Benoît H. Lessard<sup>1,4,\*</sup>*

1: Department of Chemical and Biological Engineering, University of Ottawa, 161 Louis Pasteur Pvt, Ottawa, ON, Canada

2: Department of Physics, University of Ottawa, 150 Louis Pasteur Pvt, Ottawa, ON, Canada

3: Ottawa-Carleton Institute for Biomedical Engineering, University of Ottawa, 161 Louis Pasteur Pvt, Ottawa, ON, Canada

4: School of Electrical Engineering and Computer Science, University of Ottawa, 800 King Edward Ave., Ottawa, ON, Canada

\*Corresponding Author. E-mail: [benoit.lessard@uottawa.ca](mailto:benoit.lessard@uottawa.ca)

## Electronic Supporting Information

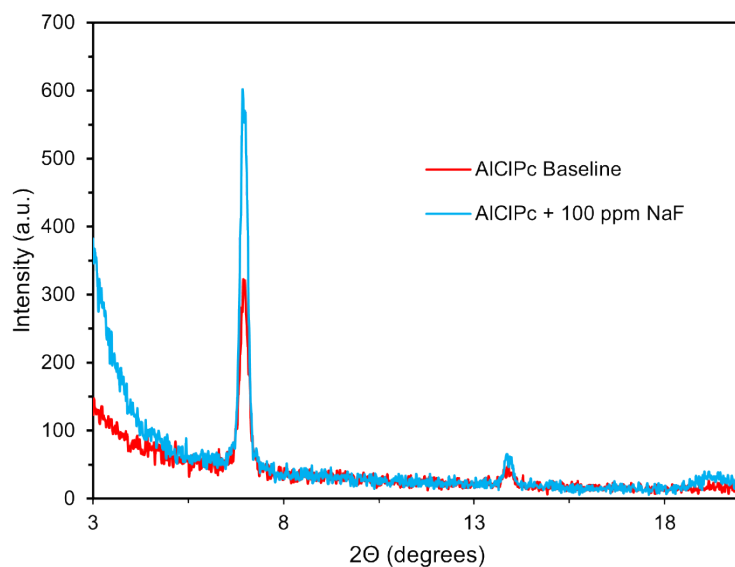

**Figure S1.** XRD Spectra of AIClPc thin films before and after exposure to a solution of 100 ppm NaF.

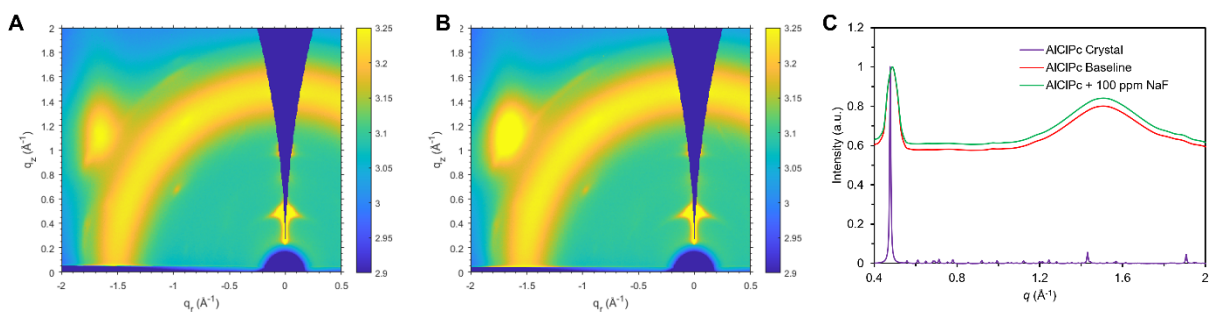

**Figure S2.** 2D scattering pattern ( $\alpha = 0.3^\circ$ ) of (A) AIClPc baseline thin-film and (B) AIClPc film treated with a 100 ppm NaF solution and (C) diffraction pattern from single crystal and GIWAXS for baseline AIClPc and treated AIClPc
